# Supplementary material
Source: Springer Nature journal article supplement (https://mijn.bsl.nl/resource/supplementary/13047_2008_87_MOESM4_ESM.pdf/7109568)
Supplement: MOESM4 [file 7109568]

Microbial Load (CFUs/m<sup>3</sup>)

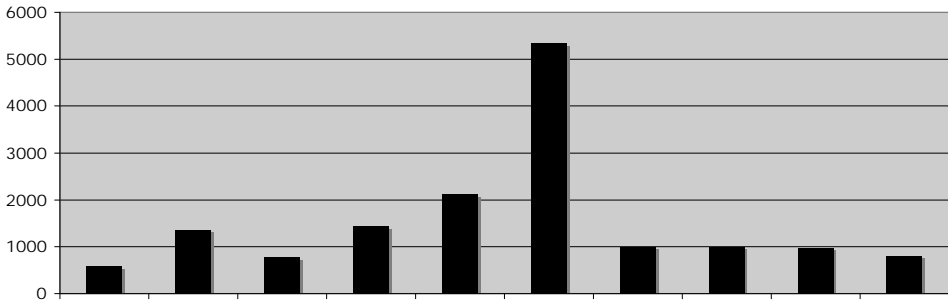

1 hour Pre Versajet (CFUs/m<sup>3</sup>)

Remove Dressing (CFUs/m<sup>3</sup>)

During Versajet 1st minute (CFUs/m<sup>3</sup>)

During Versajet 2nd minute (CFUs/m<sup>3</sup>)

During Versajet 3rd minute (CFUs/m<sup>3</sup>)

During Versajet 4th minute (CFUs/m<sup>3</sup>)

5 min Post Versajet (CFUs/m<sup>3</sup>)

15 min Post Versajet (CFUs/m<sup>3</sup>)

30 min Post Versajet (CFUs/m<sup>3</sup>)

60 min Post Versajet (CFUs/m<sup>3</sup>)
